# Supplementary material for: A novel one-step synthesized and dopant-free hole transport material for efficient and stable perovskite solar cells
Source: Royal Society of Chemistry journal article supplement (doi:10.1039/c6ta05254a), 2016-01-01
Supplement: c6ta05254a1.pdf [file c6ta05254a1.pdf]

**Electronic Supplementary Material (ESI) for Journal of Materials Chemistry A.**  
**This journal is © The Royal Society of Chemistry 2016**

**Electronic Supplementary Information (ESI)**

**Novel one-step synthesized and dopant-free hole transport material for efficient and stable perovskite solar cells**

Xiaoming Zhao,<sup>ae+</sup> Fei Zhang,<sup>abe+</sup> Chenyi Yi,<sup>b</sup> Dongqin Bi,<sup>b</sup> Xiangdong Bi,<sup>c</sup> Peng Wei,<sup>d</sup> Jingshan Luo,<sup>b</sup> Xicheng Liu,<sup>g</sup> Shirong Wang,<sup>\*ae</sup> Xianggao Li,<sup>ae</sup> Shaik Mohammed Zakeeruddin<sup>\*bf</sup> and Michael Grätzel<sup>\*b</sup>

- a) School of Chemical Engineering and Technology, Tianjin University, 300072 Tianjin, China. Email: wangshirong@tju.edu.cn
- b) Laboratory of Photonics and Interfaces, Institute of Chemical Sciences and Engineering, École Polytechnique Fédérale de Lausanne (EPFL), Station 6 CH-1015, Lausanne, Switzerland. Email: michael.graetzel@epfl.ch (M.G); shaik.zakeer@epfl.ch (S.M.Z)
- c) Department of Physical Sciences, Charleston Southern University, 9200 University Blvd., Charleston, SC 29485, USA
- d) Affinity Research Chemicals, Inc. 9 Germay Drive, Suite 300B Wilmington, DE 19804, USA
- e) Collaborative Innovation Center of Chemical Science and Engineering (Tianjin), 300072 Tianjin, China
- f) Center of Excellence for Advanced Materials Research (CEAMR), King Abdulaziz University, Jeddah, Saudi Arabia
- g) Qufu Normal University, School of Chemistry and Chemical Engineering, 273165 Qufu, China

+ X.M.Z. and F.Z. have the equivalent contribution

## Experimental Section

**Materials:** All chemicals were obtained from Sigma Aldrich, Angene Chemical, Acros or Aladdin and were used without any further treatment.  $\text{CH}_3\text{NH}_3\text{I}$  was synthesized following our previous report.<sup>1</sup>

**Synthesis and characterization of ST1:** Synthetic route is shown in **Figure 1**.

**4-(4-(bis(4-(4-(dibutylamino)styryl)phenyl)amino)styryl)-N,N-dibutylaniline (ST1):** ST1 was synthesized by a one-step Heck reaction: To a Schlenk tube equipped with a Teflon valve was added tris(4-bromophenyl)amine (0.481 g, 1 mmol), 4-N,N-dibutylaminostyrene (0.836 g, 3.6 mmol),  $\text{Pd}(\text{OAc})_2$  (20 mg, 0.089 mmol), tri-*o*-tolylphosphine (65.1 mg, 0.217 mmol),  $\text{Et}_3\text{N}$  (5 mL, 36 mmol) and anhydrous DMF (8 mL). Nitrogen was bubbled through the solution for 15 minutes. The tube was sealed and heated at 100 °C for 72h. The reaction mixture was then poured into 300 mL water and extracted using 500 mL ethylacetate. The crude product was purified by column chromatography (silica gel, hexane: ethylacetate = 1:30) to give pure product ST1 (0.802 g, yield 86%).  $^1\text{H}$  NMR (400 MHz,  $\text{CDCl}_3$ )  $\delta$  7.42 (m, 12H), 7.15 (m, 6H), 7.00 (d,  $J = 19.0$  Hz, 6H), 6.67 (m, 6H), 3.33 (t,  $J = 7.7$  Hz, 12H), 1.64 (dd,  $J = 15.2, 7.7$  Hz, 12H), 1.41 (m, 12H), 1.01 (t,  $J = 7.3$  Hz, 18H).  $^{13}\text{C}$  NMR (101 MHz,  $\text{CDCl}_3$ )  $\delta$  147.73, 127.62, 127.25, 126.81, 124.47, 111.69, 77.36, 77.24, 77.04, 76.72, 76.72, 50.83, 29.53, 20.38, 14.04. Measured mass (933.2104), calculated mass for  $\text{C}_{66}\text{H}_{84}\text{N}_4$  (933.43).

**Instruments and measurements:** Nuclear magnetic resonance (NMR) spectra were recorded on a INOVA 500 MHz spectrometer. Mass spectra were recorded on a FINNIGAN LCQ Advantage mass spectrometer. UV-vis spectra were collected on a Thermo Evolution 300 UV-visible spectrometer in the  $10^{-5}$  mol  $\text{L}^{-1}$  THF solution. Decomposition temperature ( $T_d$ ) and glass transition temperature ( $T_g$ ) of the synthesized compounds were determined by thermo gravimetric analysis (TGA) and differential scanning calorimetry (DSC) on a TA Q500 thermo gravimetric analyzer and TA Q20 thermal analyzer. Cyclic Voltammetry (CV) was carried out on an IM6e electrochemistry workstation in the  $10^{-3}$  mol  $\text{L}^{-1}$  THF solution with 0.1 mol  $\text{L}^{-1}$  tetrabutylammonium perchlorate (TBAP) as supporting electrolyte, Pt electrode as working electrode and counter electrode, saturated calomel electrode as reference electrode, with a scanning rate of 30  $\text{mV s}^{-1}$  at room temperature. Surface morphology of the  $\text{TiO}_2/\text{CH}_3\text{NH}_3\text{PbI}_3/\text{HTM}/\text{Au}$  film was obtained by using a XL30S-FEG, FEI scanning electron microscope (SEM).

**Mobility measurements:** The time-of-flight (TOF) measurements were conducted on TOF401 (Sumitomo Heavy Ltd., Japan). Hole-only devices were prepared using a structure of ITO/HTM ( $\sim 1$   $\mu\text{m}$ ) /Al (120 nm) with an active area of 3 mm  $\times$  10 mm. Indium-tin-oxide (ITO) coated substrates were cleaned with following sequence: in acetone, methanol, and diluted water, then annealed at 120 °C for 20 min followed by  $\text{O}_2$  plasma treatment. The chlorobenzene solutions of ST1 (25  $\text{mg mL}^{-1}$ ) were spin-coated on a cleaned ITO-coated glass substrate several times at a spinning rate of 2000 rpm to achieve the hole transport layers with the thickness of  $\sim 1$   $\mu\text{m}$ , and then the films were baked at 50 °C for 25 min in nitrogen atmosphere to evaporate any residual solvent. Then, a 120 nm Al were evaporated as the cathode. **Figure S2** displays typical room-temperature TOF transient of holes for ST1 under an applied field of  $\sim 2.5 \times 10^5$   $\text{V cm}^{-1}$ . The transit time ( $t_T$ ) was obtained from the intersection point of two asymptotes in the double-logarithmic representations (insets of **Figure S2**).

**Device fabrication:** To fabricate the devices, the conductive fluorine-doped tin oxide (FTO) substrates were cleaned with following sequence: in deionized water, acetone and isopropanol. A compact titanium dioxide ( $\text{TiO}_2$ ) layer of about 50 nm was deposited by spray pyrolysis of 10 ml 2-propanol solution containing 0.6 g titanium diisopropoxide bis(acetylacetonate) solution (75% in 2-propanol, Sigma-Aldrich) and 0.4 g acetylacetonate at 450 °C in air. The preparation of  $\text{TiO}_2$  organic solution following our previous literature.<sup>1</sup> A 200 nm mesoporous  $\text{TiO}_2$  was coated on the substrate by spin coating with a speed of 5000 rpm for 20 s with a ramp of 2000 rpm, from a diluted 30 nm particle paste (Dyesol) in Ethanol, the weight ratio of  $\text{TiO}_2$  and Ethanol is 6:1. After that, the substrates were sintered at 500°C for 30 min. The  $\text{CH}_3\text{NH}_3\text{PbI}_3$  film was fabricated by anti-solvent method using a similar method as developed by our recent paper.<sup>2</sup> The perovskite film was deposited by spin coating onto the  $\text{TiO}_2$  substrate. The precursor solution was prepared in a glovebox of 1.30 M  $\text{PbI}_2$  in DMSO, where the molar ratio for  $\text{PbI}_2/\text{CH}_3\text{NH}_3\text{I}$  is 1.05:1. The spin-coating procedure was performed by 2000 rpm for 10 s followed with 6000 rpm for 30 s. Chlorobenzene (100  $\mu\text{l}$ ) was dropped on the spinning substrate during the second spin-coating step 15 s before the end

of the procedure. The substrate was then heated at 100 °C for 90 min on a hotplate. Then, the HTMs were deposited on the top of perovskite by spin coating at 4000 rpm for 20 s. The Spiro-OMeTAD solutions were prepared dissolving the Spiro-OMeTAD in 1 ml chlorobenzene at concentration of 60 mM with the addition of 30  $\mu$ l t-BP, 18  $\mu$ l of 520 mg ml<sup>-1</sup> LiTFSI acetonitrile solution. ST1 was dissolved in chlorobenzene at 25 mg mL<sup>-1</sup> and devices were finalized by thermal evaporation of 80 nm gold.

*Device characterization:* Current-voltage characteristics of the devices were measured with a solar simulator employing a light source and a digital source meter (Keithley Model 2400). The light source was a 450 W xenon lamp (Oriel) equipped with a Schott K113 Tempax sunlight filter (Prazisions Glas & Optik GmbH) to match the emission spectrum of the lamp with the AM1.5G standard in the region of 350-750 nm. The setting time was 0.01 s and the delay time was 0 s. IPCE spectra were recorded by focusing light from the 300W Xenon lamp (ILC Technology, USA) through a Gemini-180 double monochromator (Jobin Yvon Ltd., UK). The monochromatic light WAS chopped at 3 Hz before impinging onto the photovoltaic cell. The monochromator was incremented through the visible spectrum to generate the IPCE dependence on wavelength. All measurements were conducted using a non-reflective metal aperture of 0.16 cm<sup>2</sup> to define the active area of the device and avoid light piping through the sides and the cover glass.

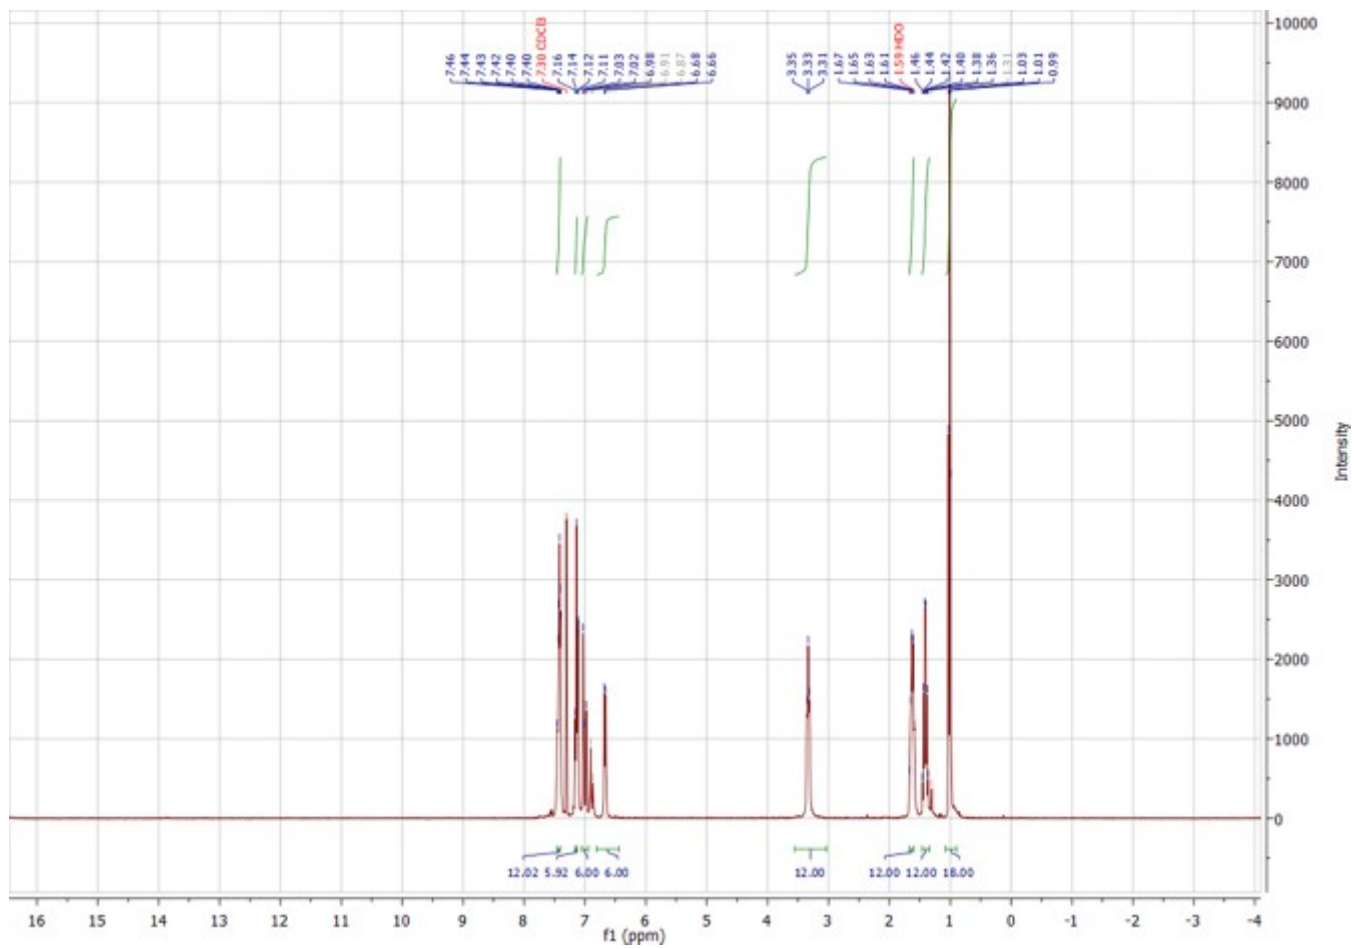

Figure S1. <sup>1</sup>H NMR spectrum of ST1

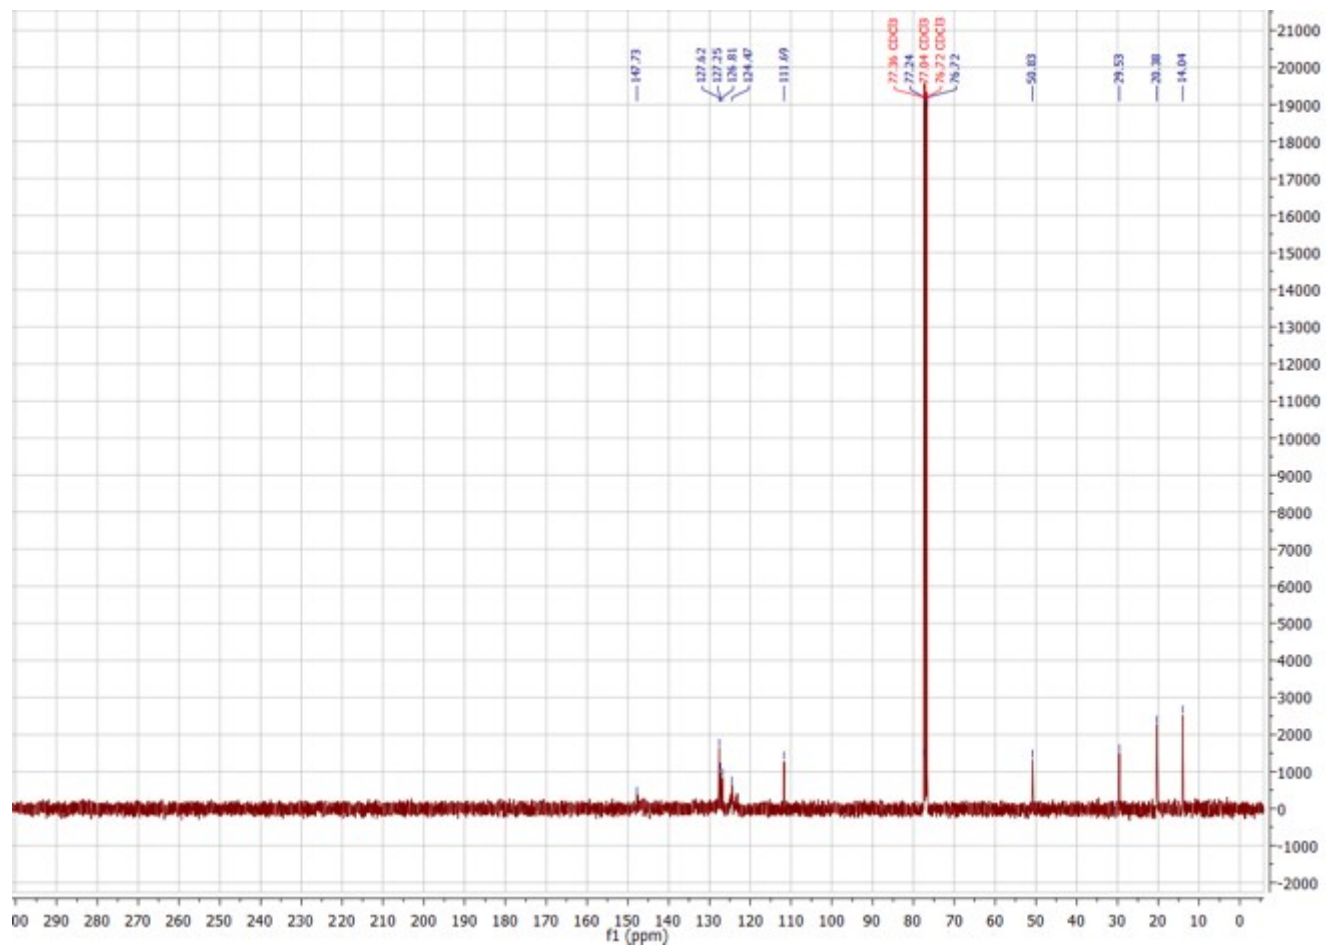

Figure S2.  $^{13}\text{C}$  NMR spectrum of ST1

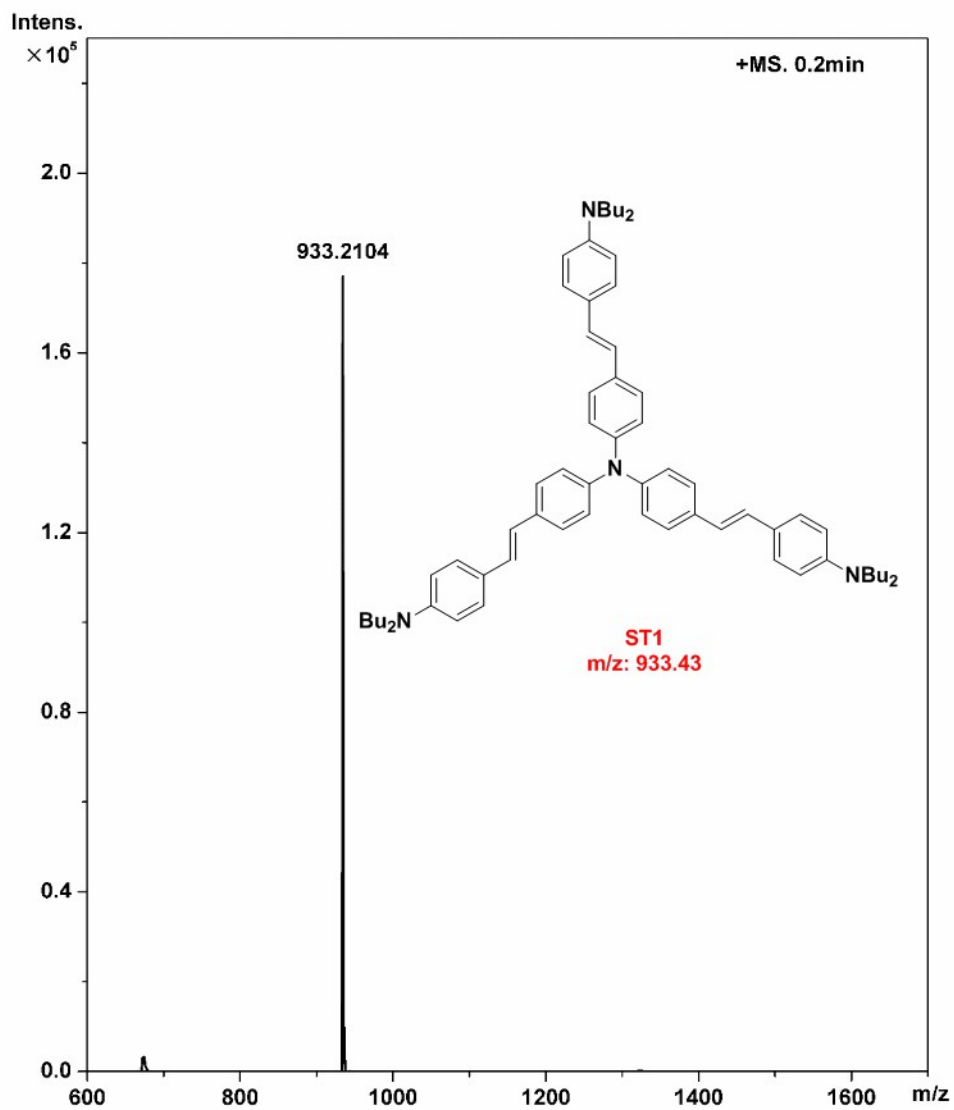

Figure S3. Mass spectrum of ST1

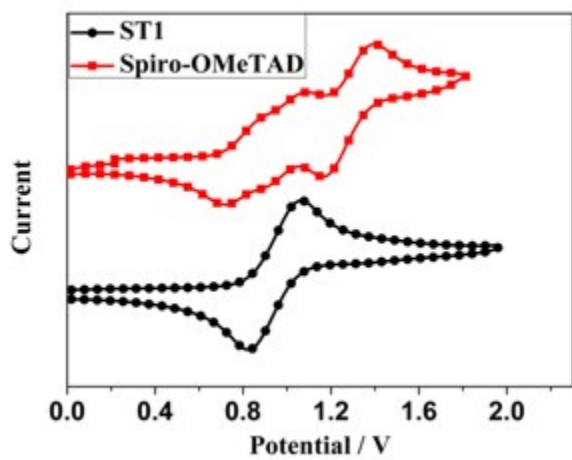

Figure S4. Cyclic voltammograms of ST1 and Spiro-OMeTAD

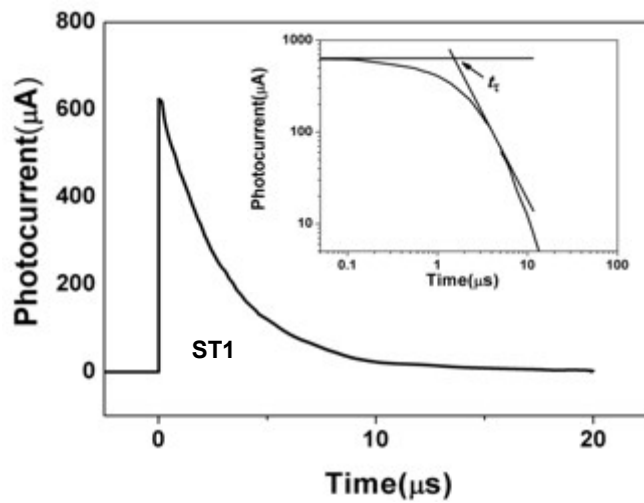

Figure S5. TOF transient for ST1 at room temperature



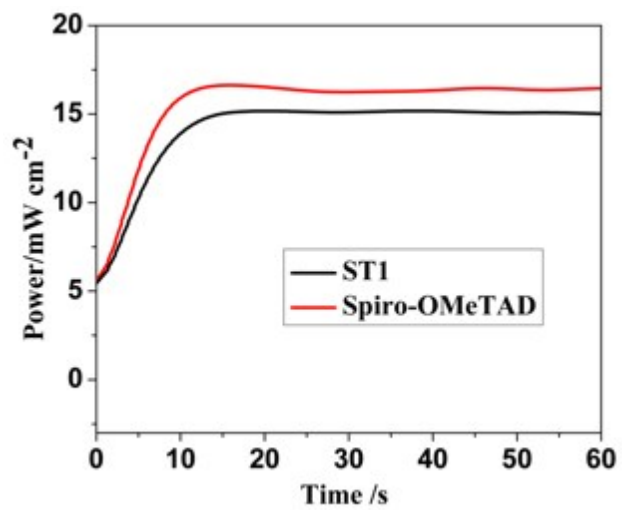

Figure S6. The stabilized power output for PSCs fabricated with ST1 and Spiro-OMeTAD

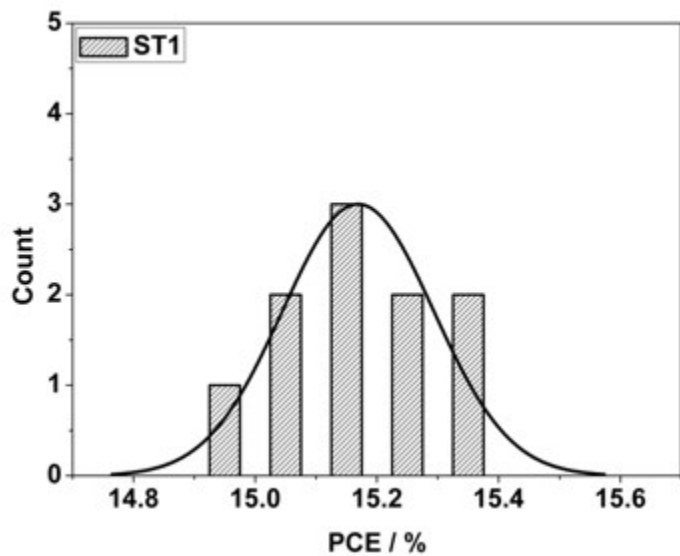

Figure S7. The reproducibility of perovskite solar cells based on dopant-free ST1

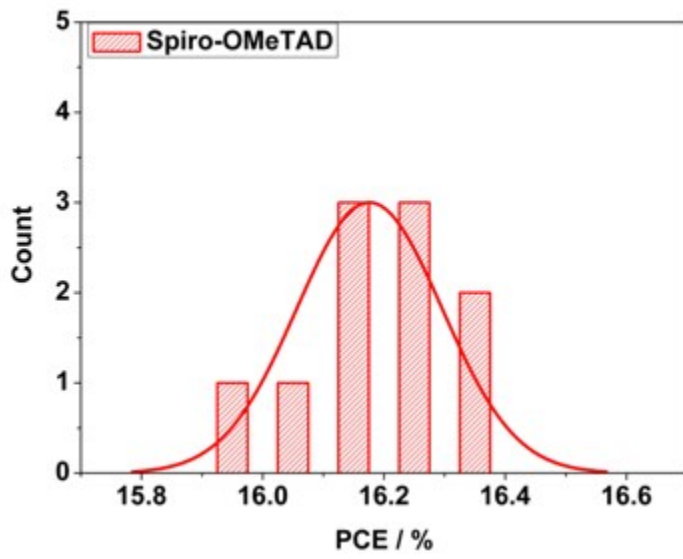

Figure S8. The reproducibility of perovskite solar cells based on doped Spiro-OMeTAD

**Table S1** The quantities and prices of commercial reagents, solvents and materials for the production of 1 gram of ST1

| Materials                                                                         | quantity | Unit-price <sup>a)</sup> | Total price (USD) |
|-----------------------------------------------------------------------------------|----------|--------------------------|-------------------|
| 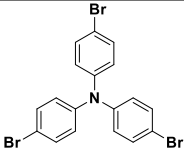 | 0.600g   | 15.4 USD/1g              | 9.733             |
|  | 1.042g   | 10 USD/1g                | 10.420            |
| Pd(OAc) <sub>2</sub>                                                              | 0.025g   | 80.2 USD/1g              | 2.005             |
| Tri-o-tolylphosphine                                                              | 0.081g   | 22.7 USD/ 1g             | 1.839             |
| DMF                                                                               | 6.235ml  | 19.5 USD/ 500ml          | 0.243             |
| Et <sub>3</sub> N                                                                 | 10ml     | 24.7 USD/ 1L             | 0.247             |
| 60 μm silica gel                                                                  | 263g     | 19.9 USD/ 1kg            | 5.234             |
| Deionized Water                                                                   | 400ml    | 29.0 USD/ 25L            | 0.464             |
| Ethyl acetate                                                                     | 987ml    | 57.1 USD/ 10L            | 5.636             |
| Hexane                                                                            | 13ml     | 59.0 USD/ 1L             | 0.767             |
| Total cost to obtain 1 gram of ST1                                                |          |                          | 36.588            |

<sup>a)</sup> All data about prices in this table are respectively from Sigma-Aldrich, Aladdin and Angene Chemical website on July 31, 2016.

**Table S2** Photovoltaic parameters of perovskite solar cells at room temperature in ambient air under dark of 30 % relative humidity (fresh and after 4 weeks)

| sample                     | $J_{sc}$ (mA cm <sup>-2</sup> ) | $V_{oc}$ (V) | FF   | PCE(%) |
|----------------------------|---------------------------------|--------------|------|--------|
| Fresh ST1                  | 21.07                           | 1.059        | 0.66 | 15.4   |
| ST1 after 2 weeks          | 20.77                           | 1.042        | 0.64 | 14.9   |
| ST1 after 4 weeks          | 20.25                           | 1.036        | 0.60 | 13.2   |
| Fresh Spiro-OMeTAD         | 21.41                           | 1.034        | 0.71 | 16.3   |
| Spiro-OMeTAD after 2 weeks | 20.10                           | 1.017        | 0.65 | 13.8   |
| Spiro-OMeTAD after 4 weeks | 18.98                           | 1.002        | 0.52 | 10.3   |

**Table S3** Synthetic steps of reported dopant-free HTMs and doped Spiro-OMeTAD and the corresponding parameters for PSCs based on them

| HTMs               | Structure                                                                           | MW      | $T_g$ (°C) | PCE(%) | Long-term stability                                                                                                               | Synthetic steps | Reference             |
|--------------------|-------------------------------------------------------------------------------------|---------|------------|--------|-----------------------------------------------------------------------------------------------------------------------------------|-----------------|-----------------------|
| Trux-OMeTAD        | 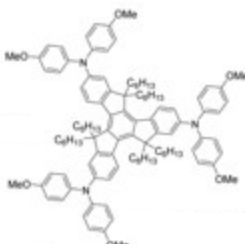   | 1529.20 | n/a        | 18.6   | n/a                                                                                                                               | 4               | 4                     |
| Z1011              |    | 1701.46 | 149.4      | 16.5   | PCE increased by 9% after 1008h in dry air without encapsulation                                                                  | 8               | 1                     |
| Z1013              |   | 2428.9  | 171.8      | 15.4   | The device showed a slight increase of the PCE after 4 weeks storing at room temperature under ambient air condition.             | 8               | 7                     |
| DERDTS-TBDT        |  | 1752.59 | n/a        | 16.2   | PCE drooped by 5% after 220 hours without encapsulation in the N <sub>2</sub> glove box                                           | 6               | 3                     |
| DORDTS-DFBT        |  | 1514.55 | n/a        | 6.2    | PCE drooped by 80% after 220 hours without encapsulation in the N <sub>2</sub> glove box                                          | 4               | 3                     |
| SAF-OMe            |  | 1316.57 | 126.0      | 12.4   | PCE drooped by 39% after 240 hours in ambient condition at a relative humidity of 30% without any encapsulation.                  | 3               | 5                     |
| DFTAB              |  | 1023.41 | n/a        | 7.2    | n/a                                                                                                                               | 1               | 6                     |
| Doped Spiro-OMeTAD |  | 1225.43 | 125.0      | 16.3   | PCE drooped by 37% after 672 hours at room temperature without encapsulation in ambient air in the dark at 30 % relative humidity | 5               | Studied in this paper |

|     |                                                                                   |        |       |      |                                                                                                                                          |   |                               |
|-----|-----------------------------------------------------------------------------------|--------|-------|------|------------------------------------------------------------------------------------------------------------------------------------------|---|-------------------------------|
| ST1 | 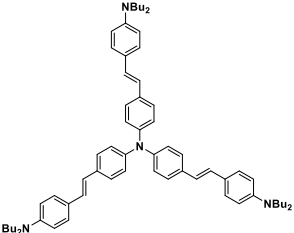 | 933.21 | 100.3 | 15.4 | <p>PCE drooped by 14% after 672 hours at room temperature without encapsulation in ambient air in the dark at 30 % relative humidity</p> | 1 | <p>Reported in this paper</p> |
|-----|-----------------------------------------------------------------------------------|--------|-------|------|------------------------------------------------------------------------------------------------------------------------------------------|---|-------------------------------|

## Reference

1. F. Zhang, C. Yi, P. Wei, X. Bi, J. Luo, G. Jacopin, S. Wang, X. Li, Y. Xiao, S. M. Zakeeruddin and M. Grätzel, *Adv. Energy Mater* 2016, **6**, 1600401.
2. D. Bi, W. Tress, M. I. Dar, P. Gao, J. Luo, C. Renevier, K. Schenk, A. Abate, F. Giodano, J. C. Baena, J. Decoppet, S. M. Zakeeruddin, M. K. Nazeeruddin, M. Grätzel and A. Hagfeldt, *Sci. Adv.* 2016, **2**, 1-7
3. Y. Liu, Z. Hong, Q. Chen, H. Chen, W. H. Chang, Y. Yang, T. B. Song and Y. Yang, *Adv Mater* 2016, **28**, 440-446.
4. C. Huang, W. Fu, C. Z. Li, Z. Zhang, W. Qiu, M. Shi, P. Heremans, A. Jen and H. Chen, *J Am Chem Soc* 2016, **138**, 2528-2531.
5. Y. K. Wang, Z. C. Yuan, G. Z. Shi, Y. X. Li, Q. Li, F. Hui, B. Q. Sun, Z. Q. Jiang and L. S. Liao, *Adv Funct Mater* 2016, **26**, 1375-1381.
6. H. Chen, D. Bryant, J. Troughton, M. Kirkus, M. Neophytou, X. Miao, J. R. Durrant and I. McCulloch, *Chem Mater* 2016, **28**, 2515-2518.
7. F. Zhang, X. Zhao, C. Yi, D. Bi, X. Bi, P. Wei, X. Liu, S. Wang, X. Li, S. Zakeeruddin, M. Grätzel, *Dyes and Pigments*, **2016**, DOI: 10.1016/j.dyepig.2016.08.00
